# Supplementary material for: Introduction of synaptotagmin 7 promotes facilitation at the climbing fiber to Purkinje cell synapse
Source: PubMed Central journal article supplement — Cell Rep. Author manuscript; Available in PMC 2022 May 31. (PMC9152841; doi:10.1016/j.celrep.2021.109719), 2021-09-21
Supplement: NIHMS1742919-supplement-1.pdf [file NIHMS1742919-supplement-1.pdf]

**Cell Reports, Volume 36**

**Supplemental information**

**Introduction of synaptotagmin 7  
promotes facilitation at the climbing  
fiber to Purkinje cell synapse**

**Christopher Weyrer, Josef Turecek, Bailey Harrison, and Wade G. Regehr**

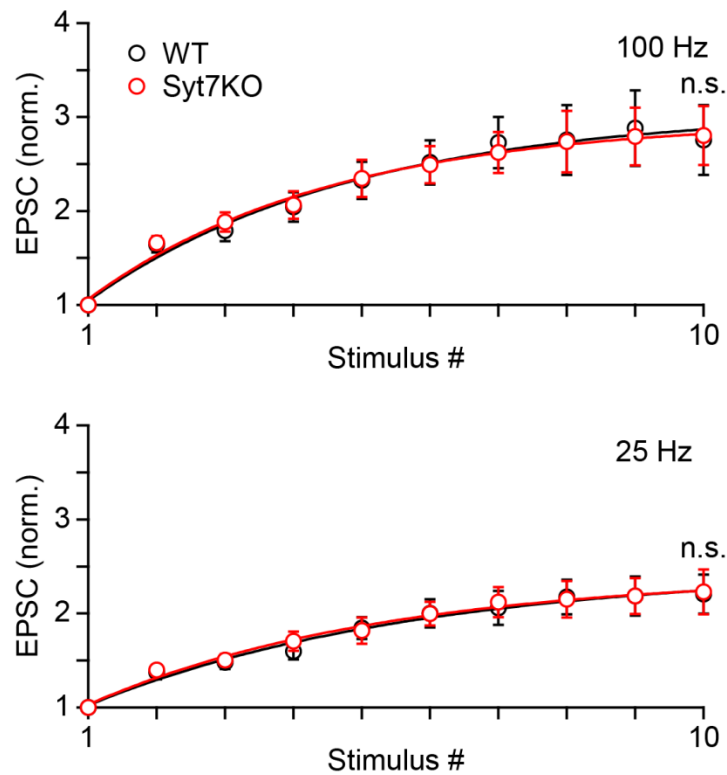

**Figure S1: Synaptic train facilitation does not depend on Synaptotagmin 7 at the cerebellar climbing fiber to Purkinje cell (CF-PC) synapse.** Related to Figure 1. Experiments were performed in wild-type (WT, black) and Synaptotagmin 7 knockout (Syt7KO) animals at the CF-PC synapse under conditions of low ( $\sim 0.3$  mM) external calcium. The summary for the normalized average EPSC amplitudes is shown for the 100 Hz (*upper*) and 25 Hz (*lower*) trains. Data shown as mean  $\pm$  SEM.

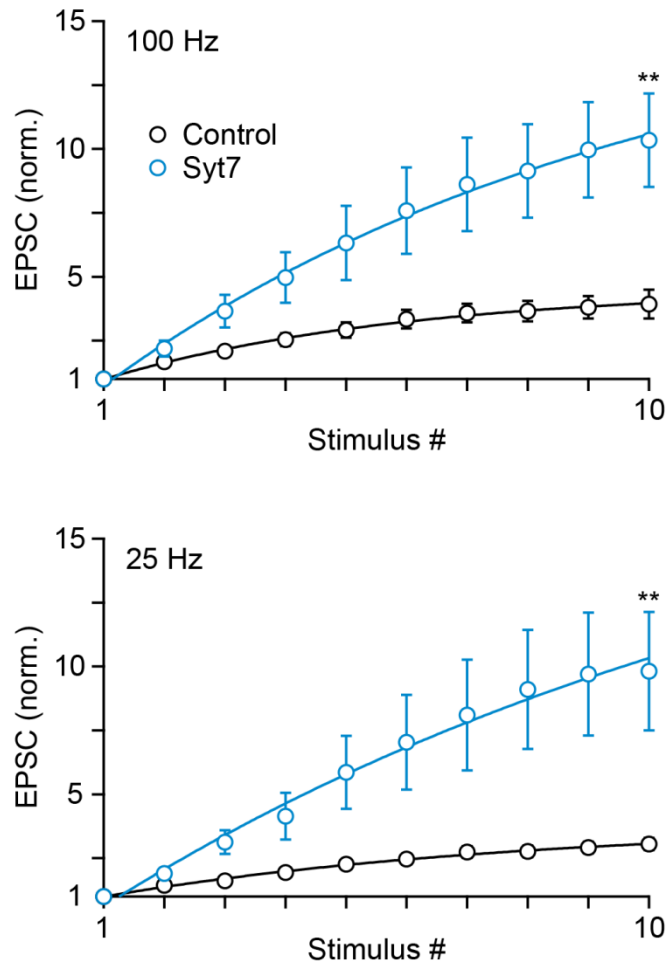

**Figure S2: Expression of Syt7 in climbing fibers leads to a drastic increase in train facilitation at climbing fiber to Purkinje cell (CF-PC) synapses.** Related to Figure 3. Train facilitation experiments were performed in ChR2 (black) and Syt7-ChR2 (light blue) injected animals at the CF-PC synapse under conditions of low (~0.3 mM) external calcium. The summary for the normalized average EPSC amplitudes is shown for the 100 Hz (*upper*) and 25 Hz (*lower*) train. Statistical significance (unpaired t-test; see Table S1): \*\*  $p < 0.01$ . Data shown as mean  $\pm$  SEM.

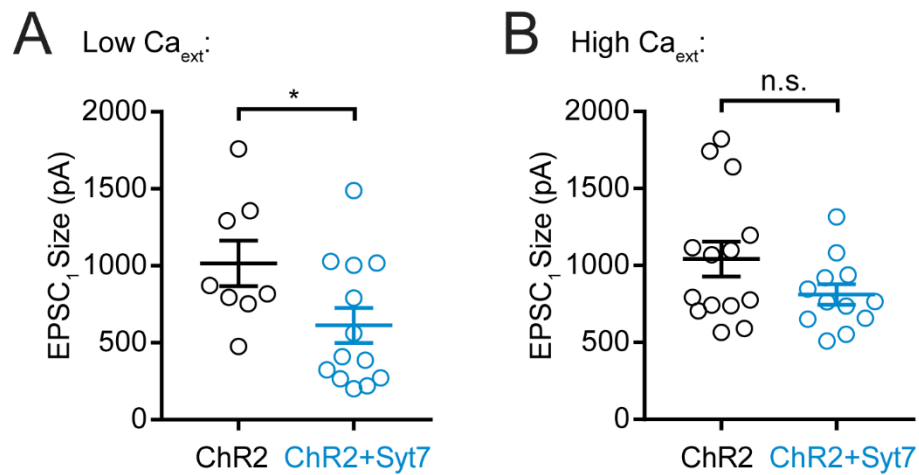

**Figure S3: The effect of synaptotagmin 7 expression on EPSC1 size.** Related to Figure 3. Experiments were performed in ChR2 (black) and Syt7-ChR2 (light blue) injected animals at the CF-PC synapse under conditions of low (A) or high (B) external calcium. (A, B) Comparison of EPSC<sub>1</sub> sizes across all low (A) and high (B) external calcium PPR experiments. Scatter plots with mean  $\pm$  SEM indicated. Statistical significance (unpaired t-test; see **Table S1**): \*:  $p < 0.05$ , not significant (n.s.)

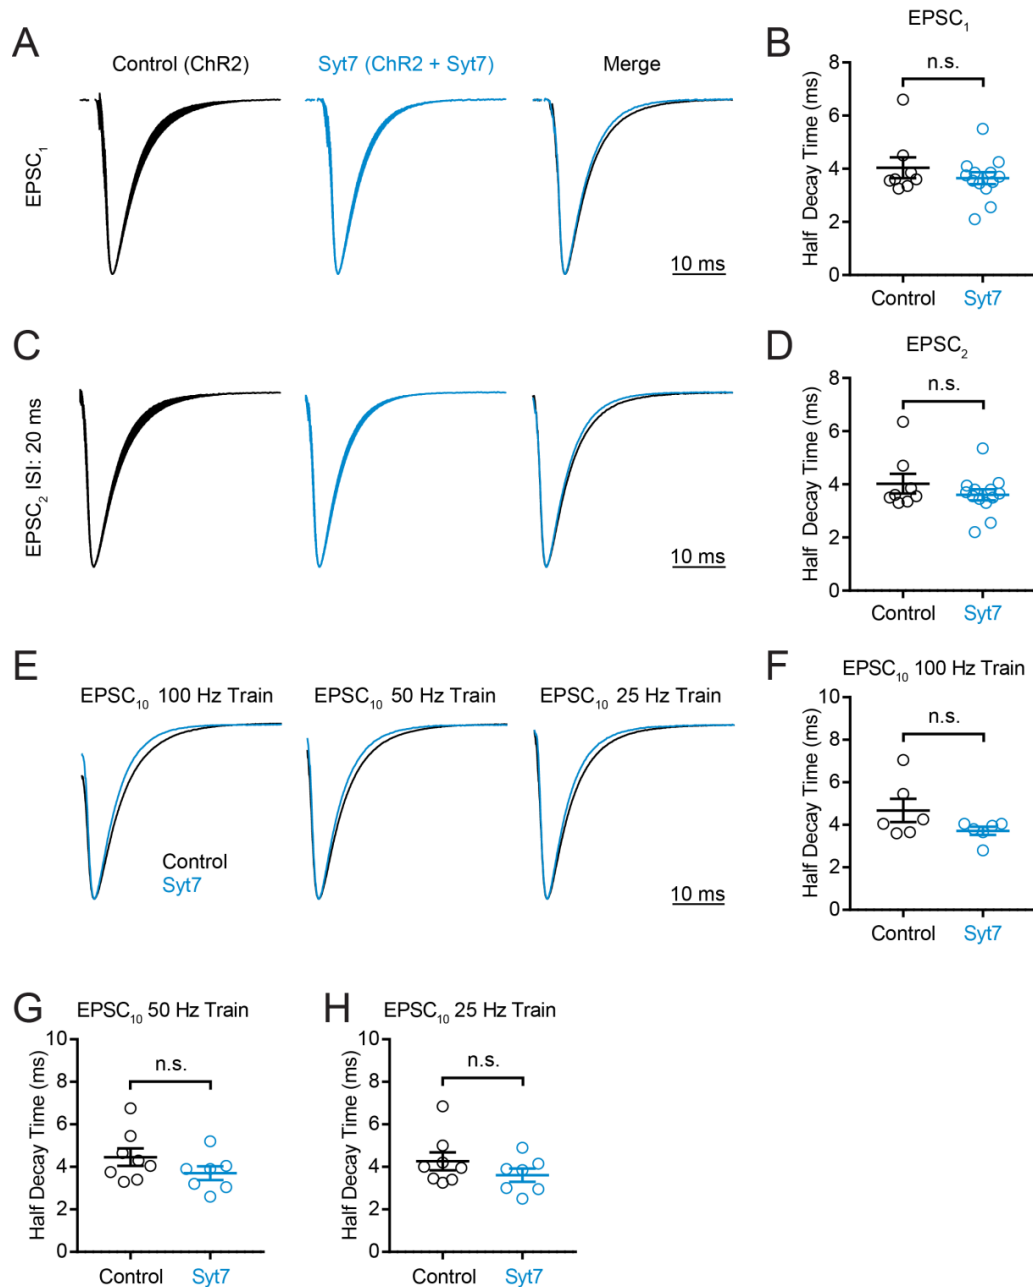

**Figure S4: Synaptotagmin 7 expression in climbing fibers does not significantly change EPSC decay in low external calcium.** Related to Figure 3.

Experiments were performed in ChR2 (black) and Syt7-ChR2 (light blue) injected animals at the CF-PC synapse under conditions of low (~0.3 mM) external calcium.

(A) Normalized to the EPSC<sub>1</sub> of low calcium PPR experiments displayed as average  $\pm$  SEM (left, middle) or average only (right).

(C) Same as in (A) except normalized to the second EPSC of 20 ms ISI PPR experiments

(E) Normalized to EPSC<sub>10</sub> of low calcium train experiments. Only averages are shown for ChR2 (black) and ChR2-Syt7 (light blue) for 100 Hz (left), 50 Hz (middle) and 25 Hz (right) trains

(B, D, F, G, H) Half Decay Times are plotted with mean  $\pm$  SEM indicated. Statistical significance (unpaired t-test; see Table S1) Statistical significance (unpaired t-test; see Table S1): not significant (n.s.)

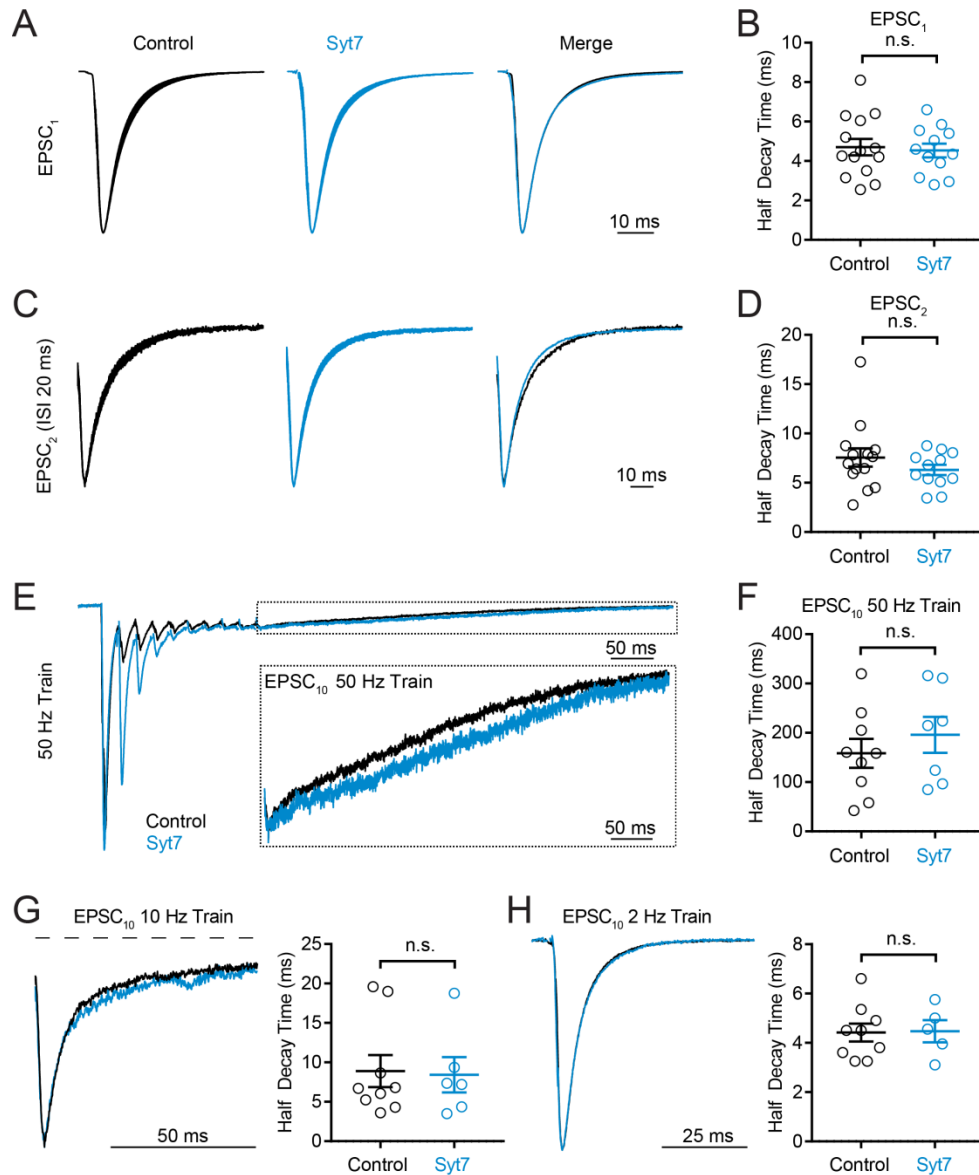

**Figure S5: Synaptotagmin 7 expression in climbing fibers does not significantly change EPSC decay in high external calcium.** Related to Figure 4.

Experiments were performed in ChR2 (black) and Syt7-ChR2 (light blue) injected animals at the CF-PC synapse under conditions of high (~4 mM) external calcium.

(A) Normalized to the EPSC<sub>1</sub> of high calcium PPR experiments displayed as average ± SEM (*left, middle*) or average only (*right*).

(C) Same as in (A) except normalized to the second EPSC of 20 ms ISI PPR experiments

(E, G *left, H left*) Normalized to EPSC<sub>10</sub> of high calcium 10 stimuli train experiments. Only averages are shown for ChR2 (black) and ChR2-Syt7 (light blue) for 50 Hz (E), 10 Hz (G *left*) and 2 Hz (H *left*) trains. Dashed line indicates baseline at zero (G *left*).

(B, D, F, G *right, H right*) Half decay times are plotted with mean ± SEM indicated.

Statistical significance (unpaired t-test; see Table S1) Statistical significance (unpaired t-test; see Table S1): not significant (n.s.)

| Fig. | Measurement                                          | Genotype  | n/N  | Mean $\pm$ SEM     | Statistical test | p        |
|------|------------------------------------------------------|-----------|------|--------------------|------------------|----------|
| 1A   | PPR, ISI: 10 ms                                      | WT        | 6/2  | 1.54 $\pm$ 0.08    | Student's t-test | 0.62     |
|      |                                                      | Syt7KO    | 13/9 | 1.6 $\pm$ 0.07     |                  |          |
| 1B   | 50 Hz: EPSC <sub>10</sub> /EPSC <sub>1</sub>         | WT        | 9/2  | 2.77 $\pm$ 0.28    | Student's t-test | 0.89     |
|      |                                                      | Syt7KO    | 9/2  | 2.72 $\pm$ 0.28    |                  |          |
| 1C   | PPR, ISI: 10 ms                                      | WT        | 4/2  | 0.17 $\pm$ 0.006   | Student's t-test | 0.22     |
|      |                                                      | Syt7KO    | 4/2  | 0.18 $\pm$ 0.009   |                  |          |
| 3A   | PPR, ISI: 10 ms                                      | ChR2      | 8/7  | 1.58 $\pm$ 0.07    | Student's t-test | 0.016 *  |
|      |                                                      | ChR2-Syt7 | 12/9 | 2.43 $\pm$ 0.25    |                  |          |
| 3B   | 50 Hz: EPSC <sub>10</sub> /EPSC <sub>1</sub>         | ChR2      | 8/7  | 3.62 $\pm$ 0.23    | Student's t-test | <0.01 ** |
|      |                                                      | ChR2-Syt7 | 7/5  | 11.3 $\pm$ 2.6     |                  |          |
| 4A   | PPR, ISI: 10 ms                                      | ChR2      | 13/9 | 0.16 $\pm$ 0.01    | Student's t-test | <0.01 ** |
|      |                                                      | ChR2-Syt7 | 11/6 | 0.66 $\pm$ 0.05    |                  |          |
| 4A   | PPR, ISI: 500 ms                                     | ChR2      | 13/9 | 0.76 $\pm$ 0.03    | Student's t-test | <0.01 ** |
|      |                                                      | ChR2-Syt7 | 11/7 | 1.14 $\pm$ 0.04    |                  |          |
| 4B   | 50 Hz: EPSC <sub>10</sub> /EPSC <sub>1</sub>         | ChR2      | 9/6  | 0.03 $\pm$ 0.005   | Student's t-test | 0.63     |
|      |                                                      | ChR2-Syt7 | 6/4  | 0.02 $\pm$ 0.006   |                  |          |
| 4C   | 10 Hz: EPSC <sub>10</sub> /EPSC <sub>1</sub>         | ChR2      | 9/6  | 0.19 $\pm$ 0.03    | Student's t-test | 0.74     |
|      |                                                      | ChR2-Syt7 | 6/4  | 0.17 $\pm$ 0.02    |                  |          |
| 4D   | 2 Hz: EPSC <sub>10</sub> /EPSC <sub>1</sub>          | ChR2      | 9/6  | 0.69 $\pm$ 0.02    | Student's t-test | <0.01 ** |
|      |                                                      | ChR2-Syt7 | 5/3  | 0.82 $\pm$ 0.03    |                  |          |
| 4G   | 50 Hz: EPSC <sub>11</sub> /EPSC <sub>1</sub>         | ChR2      | 7/5  | 0.66 $\pm$ 0.08    | Student's t-test | 0.87     |
|      |                                                      | ChR2-Syt7 | 6/4  | 0.68 $\pm$ 0.08    |                  |          |
| S1   | 100 Hz: EPSC <sub>10</sub> /EPSC <sub>1</sub>        | WT        | 7/2  | 2.76 $\pm$ 0.37    | Student's t-test | 0.93     |
|      |                                                      | Syt7KO    | 8/2  | 2.8 $\pm$ 0.31     |                  |          |
| S1   | 25 Hz: EPSC <sub>10</sub> /EPSC <sub>1</sub>         | WT        | 8/2  | 2.21 $\pm$ 0.21    | Student's t-test | 0.94     |
|      |                                                      | Syt7KO    | 8/2  | 2.23 $\pm$ 0.24    |                  |          |
| S2   | 100 Hz: EPSC <sub>10</sub> /EPSC <sub>1</sub>        | ChR2      | 6/5  | 3.94 $\pm$ 0.56    | Student's t-test | <0.01 ** |
|      |                                                      | ChR2-Syt7 | 6/4  | 10.34 $\pm$ 1.83   |                  |          |
| S2   | 25 Hz: EPSC <sub>10</sub> /EPSC <sub>1</sub>         | ChR2      | 8/7  | 3.05 $\pm$ 0.24    | Student's t-test | <0.01 ** |
|      |                                                      | ChR2-Syt7 | 7/5  | 9.81 $\pm$ 2.32    |                  |          |
| S3A  | EPSC <sub>1</sub> Size                               | ChR2      | 8/7  | 1015 $\pm$ 147 pA  | Student's t-test | 0.043 *  |
|      |                                                      | ChR2-Syt7 | 13/9 | 612 $\pm$ 114 pA   |                  |          |
| S3B  | EPSC <sub>1</sub> Size                               | ChR2      | 14/9 | 1042 $\pm$ 114 pA  | Student's t-test | 0.11     |
|      |                                                      | ChR2-Syt7 | 12/7 | 812 $\pm$ 66 pA    |                  |          |
| S4B  | EPSC <sub>1</sub> $\frac{1}{2}$ Decay Time           | ChR2      | 8/7  | 4.04 $\pm$ 0.39 ms | Student's t-test | 0.36     |
|      |                                                      | ChR2-Syt7 | 13/9 | 3.65 $\pm$ 0.23 ms |                  |          |
| S4D  | EPSC <sub>2</sub> $\frac{1}{2}$ Decay Time 20 ms ISI | ChR2      | 8/7  | 4.03 $\pm$ 0.37 ms | Student's t-test | 0.29     |
|      |                                                      | ChR2-Syt7 | 13/9 | 3.6 $\pm$ 0.21 ms  |                  |          |
| S4F  | EPSC <sub>10</sub> $\frac{1}{2}$ Decay Time 50 Hz    | ChR2      | 6/5  | 4.68 $\pm$ 0.55 ms | Student's t-test | 0.13     |

|     |                                             |           |      |                |                  |      |
|-----|---------------------------------------------|-----------|------|----------------|------------------|------|
|     |                                             | ChR2-Syt7 | 6/4  | 3.72 ± 0.19 ms |                  |      |
| S4G | EPSC <sub>10</sub> ½ Decay Time 10 Hz       | ChR2      | 8/7  | 4.46 ± 0.41 ms | Student's t-test | 0.18 |
|     |                                             | ChR2-Syt7 | 7/5  | 3.70 ± 0.32 ms |                  |      |
| S4H | EPSC <sub>10</sub> ½ Decay Time 2 Hz        | ChR2      | 8/7  | 4.26 ± 0.42 ms | Student's t-test | 0.24 |
|     |                                             | ChR2-Syt7 | 7/5  | 3.61 ± 0.31 ms |                  |      |
| S5B | EPSC <sub>1</sub> ½ Decay Time              | ChR2      | 14/9 | 4.70 ± 0.42 ms | Student's t-test | 0.76 |
|     |                                             | ChR2-Syt7 | 12/7 | 4.53 ± 0.35 ms |                  |      |
| S5D | EPSC <sub>2</sub> ½ Decay Time 20 ms<br>ISI | ChR2      | 14/9 | 7.55 ± 0.93 ms | Student's t-test | 0.27 |
|     |                                             | ChR2-Syt7 | 12/7 | 6.30 ± 0.52 ms |                  |      |
| S5F | EPSC <sub>10</sub> ½ Decay Time 50 Hz       | ChR2      | 9/6  | 159 ± 29 ms    | Student's t-test | 0.43 |
|     |                                             | ChR2-Syt7 | 7/4  | 196 ± 37 ms    |                  |      |
| S5G | EPSC <sub>10</sub> ½ Decay Time 10 Hz       | ChR2      | 9/6  | 8.9 ± 2.0 ms   | Student's t-test | 0.88 |
|     |                                             | ChR2-Syt7 | 6/4  | 8.4 ± 2.2 ms   |                  |      |
| S5H | EPSC <sub>10</sub> ½ Decay Time 2 Hz        | ChR2      | 9/6  | 4.42 ± 0.37 ms | Student's t-test | 0.93 |
|     |                                             | ChR2-Syt7 | 5/3  | 4.47 ± 0.45 ms |                  |      |

**Table S1: Statistical Tests of main and supplemental figures.** Related to Figures 1, 3, 4, S1, S2, S3, S4, S5). N indicates number of animals, n indicates number of neurons



| Fit: $y_0 + A \exp(-(x-x_0)/\tau)$                                 | $y_0$ | $x_0$<br>(stimuli) | A     | $\tau$<br>(stimuli) |       |                  |
|--------------------------------------------------------------------|-------|--------------------|-------|---------------------|-------|------------------|
| Fig.1B, WT                                                         | 3.5   | 1                  | -2.4  | 7.2                 |       |                  |
| Fig.1B, Syt7KO                                                     | 3     | 1                  | -1.9  | 4.2                 |       |                  |
| Fig.S1, 100Hz, WT                                                  | 3.1   | 1                  | -2    | 3.9                 |       |                  |
| Fig.S1, 100Hz, Syt7KO                                              | 3     | 1                  | -1.9  | 3.6                 |       |                  |
| Fig.S1, 25Hz, WT                                                   | 2.5   | 1                  | -1.4  | 4.9                 |       |                  |
| Fig.S1, 25Hz, Syt7KO                                               | 2.4   | 1                  | -1.4  | 4.3                 |       |                  |
| Fig.3B, Control                                                    | 4.9   | 1                  | -3.9  | 7.6                 |       |                  |
| Fig.3B, Syt7                                                       | 18    | 1                  | -17   | 8.6                 |       |                  |
| Fig.S2, 100Hz, Control                                             | 4.6   | 1                  | -3.6  | 5                   |       |                  |
| Fig.S2, 100Hz, Syt7                                                | 16    | 1                  | -16   | 9                   |       |                  |
| Fig.S2, 25Hz, Control                                              | 3.9   | 1                  | -2.9  | 7.1                 |       |                  |
| Fig.S2, 25Hz, Syt7                                                 | 20    | 1                  | -19   | 13                  |       |                  |
| Fit: $y_0 + A_1 \exp(-(x-x_0)/\tau_1) + A_2 \exp(-(x-x_0)/\tau_2)$ | $y_0$ | $x_0$<br>(ms)      | $A_1$ | $\tau_1$<br>(ms)    | $A_2$ | $\tau_2$<br>(ms) |
| Fig.1A, WT                                                         | 1     | 10                 | 0.22  | 8.0                 | 0.32  | 311              |
| Fig.1A, Syt7KO                                                     | 1     | 10                 | 0.18  | 8.0                 | 0.42  | 214              |
| Fig.1C, WT                                                         | 1     | 10                 | -0.39 | 113                 | -0.44 | 2570             |
| Fig.1C, Syt7KO                                                     | 1     | 10                 | -0.35 | 147                 | -0.47 | 2360             |
| Fig.3A, Control                                                    | 1.1   | 10                 | 0.19  | 7.7                 | 0.29  | 138              |
| Fig.3A, Syt7                                                       | 1.1   | 10                 | 0.72  | 39                  | 0.58  | 266              |

**Table S2: Fit parameters.** Related to Figures 1, 3, S1, S2. N indicates number of animals, n indicates number of neurons.
